# Supplementary material for: Glucagon regulation of carbohydrate metabolism in rainbow trout: in vivo glucose fluxes and gene expression
Source: Oxford University Press journal article supplement (doi:10.1242/jeb.211730), 2019-01-01
Supplement: jeb211730supp.pdf [file jeb211730supp.pdf]

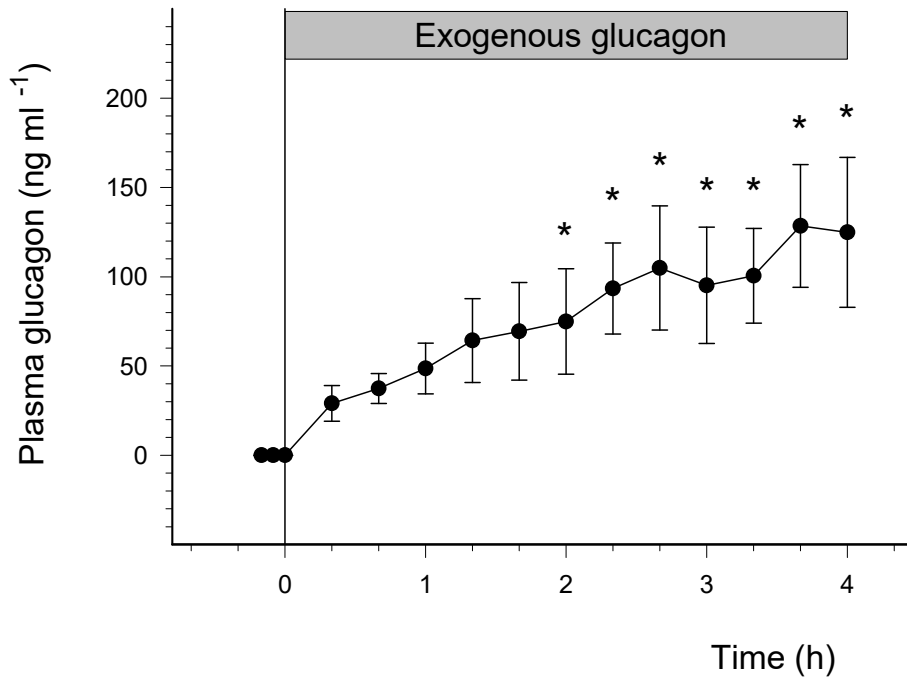

**Fig. S1.** Changes in plasma glucagon concentration caused by the administration of exogenous glucagon in adult rainbow trout during measurements of glucose kinetics. Values are means  $\pm$  s.e.m (N=8). Means significantly higher than baseline are indicated by \* ( $P < 0.05$ ).
